# Supplementary material for: Sensitivity of global direct aerosol shortwave radiative forcing to uncertainties in aerosol optical properties
Source: Copernicus journal article supplement (doi:10.5194/acp-24-4065-2024), 2024-04-05
Supplement: Supplementary file 1 [file acp-24-4065-2024-supplement.pdf]

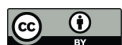

*Supplement of*

## **Sensitivity of global direct aerosol shortwave radiative forcing to uncertainties in aerosol optical properties**

**Jonathan Elsey et al.**

*Correspondence to:* Claire Ryder (c.l.ryder@reading.ac.uk)

The copyright of individual parts of the supplement might differ from the article licence.

Figures S1 and S2 are analogous to Figures 8 and 9 in the main article, but for TOA and surface DARE.

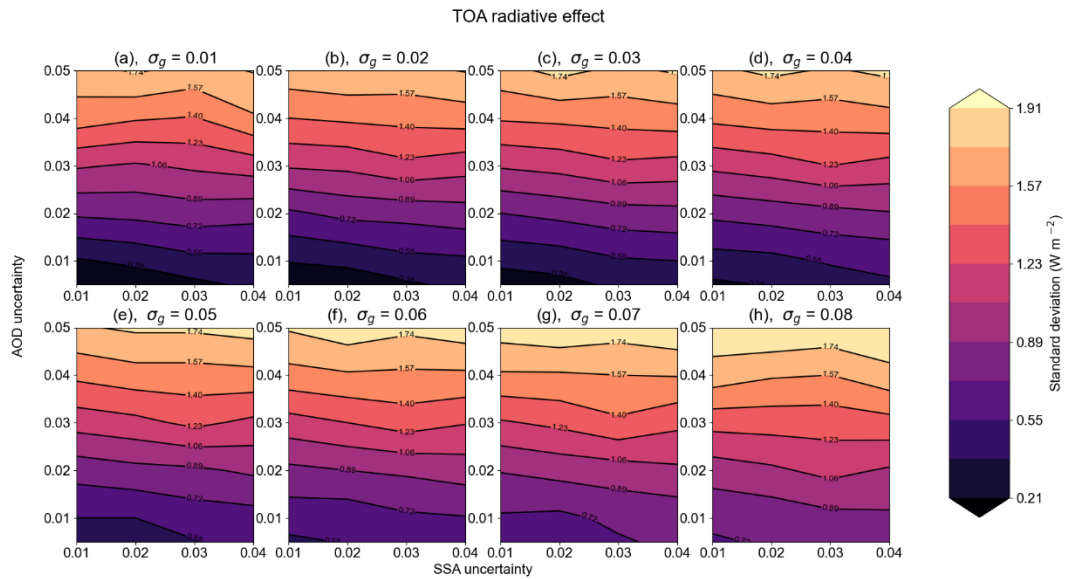

Figure S1: Contour of top-of-atmosphere (TOA) Direct Aerosol Radiative Effect uncertainty, in  $\text{W m}^{-2}$ , with respect to SSA (x-axis) and AOD (y-axis) uncertainty. Each panel represents a change in asymmetry factor uncertainty of 0.01, within the 0.01 to 0.08 range.

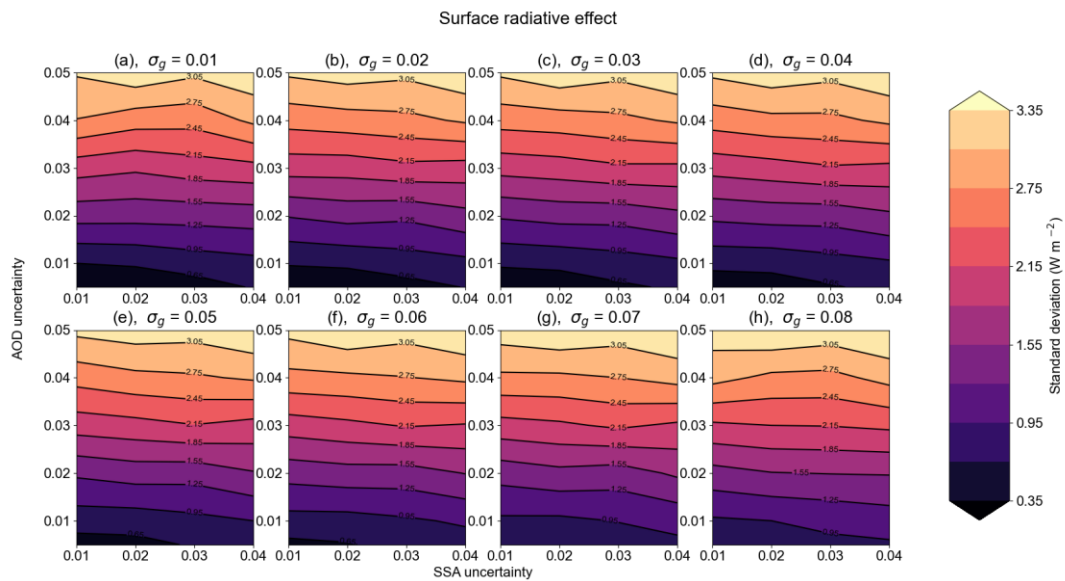

Figure S2: As Figure S1, but for surface Direct Aerosol Radiative Effect.
